# Supplementary material for: Promoting effects of indium doped Cu/CeO2 catalysts on CO2 hydrogenation to methanol
Source: Royal Society of Chemistry journal article supplement (doi:10.1039/d2re00033d), 2022-01-01
Supplement: d2re00033d1.pdf [file d2re00033d1.pdf]

## Supplementary Material

### Promoting effects of indium doping Cu/CeO<sub>2</sub> catalyst for CO<sub>2</sub> hydrogenation to methanol

Marco A. Rossi<sup>†a</sup>, Luiz H. Vieira<sup>†a,c\*</sup>, Leticia F. Rasteiro<sup>a</sup>, Marco A. Fraga<sup>b</sup>, José M. Assaf<sup>c</sup> and Elisabete M. Assaf<sup>a\*</sup>

<sup>a</sup>São Carlos Institute of Chemistry (IQSC), University of São Paulo (USP), Av. Trabalhador São-Carlense 400, CEP 13566-590, São Carlos, SP, Brazil.

<sup>b</sup>National Institute of Technology (INT/MCTIC), Av. Venezuela, 82/518, Saúde, CEP: 20081-312, Rio de Janeiro, RJ, Brazil.

<sup>c</sup>São Carlos Federal University, Chemical Engineering Department, Rod. Washington Luiz, km 235 – SP 310, CEP: 13565-905, São Carlos, SP, Brazil.

<sup>†</sup>*These authors contributed equally.*

<sup>\*</sup>*Corresponding authors: [lhvieira@ufscar.br](mailto:lhvieira@ufscar.br); [eassaf@iqsc.usp.br](mailto:eassaf@iqsc.usp.br)*

## Supplementary Tables

**Table S1.** Defined values for upper level, lower level, center points, and axial points for each one of the variables (pressure, temperature, and space velocity).

| Variable                                          | Lower         | Lower | Centre | Upper | Upper         |
|---------------------------------------------------|---------------|-------|--------|-------|---------------|
|                                                   | Axial Point   | Level | Points | Level | Axial Point   |
|                                                   | (- $\alpha$ ) | (- 1) | (0)    | (+1)  | (+ $\alpha$ ) |
| Pressure (MPa)                                    | 1.66          | 2     | 2.5    | 3     | 3.34          |
| Temperature (K)                                   | 455.96        | 473   | 498    | 523   | 540.04        |
| S. Velocity (L.g <sup>-1</sup> .h <sup>-1</sup> ) | 3.95          | 6     | 9      | 12    | 14.05         |

**Table S2.** Crystalline phase composition for CuCe, CuCeIn5, and CuCeIn10 estimated by Rietveld refinement. as well as  $R_{wp}$  and GOF (goodness-of-fit) values.

| Catalyst | Weight%          |      | Molar%           |      | $R_{wp}$ | GOF  |
|----------|------------------|------|------------------|------|----------|------|
|          | CeO <sub>2</sub> | CuO  | CeO <sub>2</sub> | CuO  |          |      |
| CuCe     | 73.0             | 27.0 | 55.6             | 44.4 | 5.25     | 3.74 |
| CuCeIn5  | 71.2             | 28.8 | 53.3             | 46.7 | 5.33     | 3.73 |
| CuCeIn10 | 73.0             | 27.0 | 55.6             | 44.4 | 5.27     | 3.87 |

**Table S3.** Chemical composition for Cu/CeO<sub>2</sub>, Cu/CeO<sub>2</sub>-5%In, and Cu/CeO<sub>2</sub>-5%In analyzed by ED-XRF.

| Catalyst | Elemental Composition (% molar) |      |     |
|----------|---------------------------------|------|-----|
|          | Cu                              | Ce   | In  |
| CuCe     | 52.5                            | 47.5 | 0.0 |
| CuCeIn5  | 54.7                            | 40.5 | 4.8 |
| CuCeIn10 | 55.3                            | 35.9 | 8.8 |

**Table S4.** CeO<sub>2</sub> lattice parameter and unit cell volume for CuCe, CuCeIn5, and CuCeIn10 catalysts calculated by Rietveld refinement, as well as R<sub>wp</sub> and GOF (goodness-of-fit) values.

| Catalyst | a <sub>CeO2</sub> (Å) | V <sub>CeO2</sub> (Å <sup>3</sup> ) |
|----------|-----------------------|-------------------------------------|
| CuCe     | 5.424                 | 159.60                              |
| CuCeIn5  | 5.414                 | 158.70                              |
| CuCeIn10 | 5.401                 | 157.59                              |

**Table S5.** CuO lattice parameters and unit cell volume for CuCe, CuCeIn5, and CuCeIn10 catalysts calculated by Rietveld refinement, as well as R<sub>wp</sub> and GOF (goodness-of-fit) values.

| Catalyst | a <sub>CuO</sub> (Å) | b <sub>CuO</sub> (Å) | c <sub>CuO</sub> (Å) | β <sub>CuO</sub> (°) | V <sub>CuO</sub> (Å <sup>3</sup> ) |
|----------|----------------------|----------------------|----------------------|----------------------|------------------------------------|
| CuCe     | 4.694                | 3.424                | 5.133                | 99.47                | 81.38                              |
| CuCeIn5  | 4.699                | 3.430                | 5.137                | 99.51                | 81.70                              |
| CuCeIn10 | 4.698                | 3.434                | 5.141                | 99.51                | 81.83                              |

**Table S6.** Pore volume obtained by N<sub>2</sub> physisorption for Cu/CeO<sub>2</sub>, CuCeO<sub>2</sub>-5%In, and Cu/CeO<sub>2</sub>-10%In catalysts.

| Catalyst | Pore total volume (cm <sup>3</sup> .g <sup>-1</sup> ) | Mesopore volume (cm <sup>3</sup> .g <sup>-1</sup> ) <sup>a</sup> | Micropore volume (cm <sup>3</sup> .g <sup>-1</sup> ) <sup>b</sup> |
|----------|-------------------------------------------------------|------------------------------------------------------------------|-------------------------------------------------------------------|
| CuCe     | 0.060                                                 | 0.055                                                            | 0.005                                                             |
| CuCeIn5  | 0.049                                                 | 0.046                                                            | 0.003                                                             |
| CuCeIn10 | 0.048                                                 | 0.045                                                            | 0.003                                                             |

<sup>a</sup>Obtained using BJH isotherm model.

<sup>b</sup>Obtained using the t-plot method.

**Table S7.** Core level binding energies for cerium and indium. The standard values were obtained from the Handbook of X-ray Photoelectron Spectroscopy.

| Catalyst | Binding Energy (eV)                |                                    |                                    |                                                 |
|----------|------------------------------------|------------------------------------|------------------------------------|-------------------------------------------------|
|          | Ce <sup>4+</sup> 3d <sup>5/2</sup> | Ce <sup>3+</sup> 3d <sup>5/2</sup> | In <sup>3+</sup> 3d <sup>5/2</sup> | In <sup>3+</sup> 3d <sup>5/2</sup> <sup>a</sup> |
| Standard | ~881.8                             | ~881.0                             | ~444.3                             | ~443.8                                          |
| CuCe     | 882.8                              | 881.1                              | -                                  | -                                               |
| CuCeIn5  | 883.1                              | 881.3                              | 444.85                             | 444.43                                          |
| CuCeIn10 | 882.7                              | 881.1                              | 444.40                             | 444.0                                           |

<sup>a</sup>In<sup>3+</sup> in non-stoichiometric oxides.

**Table S8.** Apparent activation energies for CH<sub>3</sub>OH and CO formation in the catalysts, calculated from Arrhenius plot in Figures 6d and 6e.

| Catalysts | E <sub>a</sub> CH <sub>3</sub> OH (kJ.mol <sup>-1</sup> ) | E <sub>a</sub> CO (kJ.mol <sup>-1</sup> ) |
|-----------|-----------------------------------------------------------|-------------------------------------------|
| CuCe      | 44.0                                                      | 73.2                                      |
| CuCeIn5   | 40.7                                                      | 80.4                                      |
| CuCeIn10  | 49.2                                                      | 83.9                                      |

**Table S9.** Experimental matrix designed by central composite methodology and results of CO<sub>2</sub> conversion rate and selectivity for CH<sub>3</sub>OH, CO, CH<sub>4</sub>, and C<sub>2</sub>H<sub>6</sub> products under different conditions for Cu/CeO<sub>2</sub>-5%In.

| Assay | P<br>(MPa) | T<br>(K) | S. Velocity<br>(L.g <sup>-1</sup> .h <sup>-1</sup> ) | X <sub>CO2</sub><br>(%) | S <sub>CH3OH</sub><br>(%) | S <sub>CO</sub><br>(%) | S <sub>CH4</sub><br>(%) | S <sub>C2H6</sub><br>(%) |
|-------|------------|----------|------------------------------------------------------|-------------------------|---------------------------|------------------------|-------------------------|--------------------------|
| 1     | 2          | 473      | 6                                                    | 0.9                     | 72.7                      | 26.5                   | 0.5                     | 0.3                      |
| 2     | 2          | 473      | 12                                                   | 0.6                     | 73.8                      | 25.3                   | 0.4                     | 0.5                      |
| 3     | 2          | 523      | 6                                                    | 6.0                     | 32.6                      | 66.8                   | 0.5                     | 0.1                      |
| 4     | 2          | 523      | 12                                                   | 3.7                     | 34.8                      | 64.7                   | 0.4                     | 0.1                      |
| 5     | 3          | 473      | 6                                                    | 1.7                     | 78.5                      | 20.6                   | 0.5                     | 0.4                      |
| 6     | 3          | 473      | 12                                                   | 1.0                     | 80.1                      | 19.2                   | 0.3                     | 0.4                      |
| 7     | 3          | 523      | 6                                                    | 7.7                     | 37.5                      | 61.9                   | 0.5                     | 0.1                      |
| 8     | 3          | 523      | 12                                                   | 4.7                     | 42.2                      | 57.3                   | 0.4                     | 0.1                      |
| 9     | 1.66       | 498      | 9                                                    | 1.5                     | 50.9                      | 48.5                   | 0.5                     | 0.1                      |
| 10    | 3.34       | 498      | 9                                                    | 3.0                     | 62.4                      | 37.1                   | 0.4                     | 0.1                      |
| 11    | 2.5        | 455.96   | 9                                                    | 0.3                     | 98.8                      | 0.0                    | 0.2                     | 1.0                      |
| 12    | 2.5        | 540.04   | 9                                                    | 7.9                     | 30.1                      | 69.2                   | 0.7                     | 0.0                      |
| 13    | 2.5        | 498      | 3.95                                                 | 3.3                     | 55.4                      | 44.0                   | 0.5                     | 0.1                      |
| 14    | 2.5        | 498      | 14.05                                                | 1.4                     | 61.4                      | 37.9                   | 0.5                     | 0.2                      |
| 15    | 2.5        | 498      | 9                                                    | 1.8                     | 60.3                      | 39.0                   | 0.5                     | 0.2                      |
| 16    | 2.5        | 498      | 9                                                    | 1.9                     | 59.4                      | 40.0                   | 0.4                     | 0.2                      |
| 17    | 2.5        | 498      | 9                                                    | 1.8                     | 59.8                      | 39.6                   | 0.4                     | 0.2                      |

**Supplementary Note 1:** Small amounts of ethane (< 1%) were identified between products. We speculate that this can be related to the increased stabilization of CO intermediates in In-promoted catalysts, as observed by DRIFTS analysis, which can be thermally coupled even in the absence of iron-based catalysts (generally used for the process). The very low selectivity makes this not relevant for the process, and more efforts to try to elucidate this will not lead to advances in the field.

**Table S10.** Main and interaction effects calculated for pressure, temperature and space velocity using the CuCeIn5 catalyst.

| <b>Parameters</b> | <b>Effects</b> | <b>Error</b> | <b>Standardized Effects (t)</b> | <b>Significance<sup>a</sup></b> |
|-------------------|----------------|--------------|---------------------------------|---------------------------------|
| Pressure (X1)     | 6.4057         | 0.2440       | 26.2485                         | Yes                             |
| Temperature (X2)  | -40.0589       | 0.2440       | -164.1496                       | Yes                             |
| S. Velocity (X3)  | 2.8836         | 0.2440       | 11.8163                         | Yes                             |
| X1*X2             | 0.0500         | 0.3189       | 0.1568                          | No                              |
| X1*X3             | 0.7500         | 0.3189       | 2.3522                          | No                              |
| X2*X3             | 1.0500         | 0.3189       | 3.2931                          | No                              |

<sup>a</sup>Analyzed considering the critical effect equal to 1.37 with a standardized value of 4.303.

**Table S11.** Analysis of variance (ANOVA) for the quadratic model fit to the experimental data.

| <b>Variation Source</b>    | <b>Sum of Squares</b>  | <b>Degrees of Freedom</b> | <b>Quadratic Mean</b> | <b>F- Value</b> | <b>p-Value</b>          |
|----------------------------|------------------------|---------------------------|-----------------------|-----------------|-------------------------|
| Regression                 | 5.7291x10 <sup>3</sup> | 9                         | 636.5698              | 114.6009        | 9.1983x10 <sup>-7</sup> |
| Residual                   | 38.8827                | 7                         | 5.5547                | -               | -                       |
| Lack-of-fit                | 38.476                 | 5                         | 7.6952                | 37.8453         | 0.0259                  |
| Pure Error                 | 0.4067                 | 2                         | 0.2033                | -               | -                       |
| SS <sub>Total</sub>        | 5.768x10 <sup>3</sup>  | 16                        |                       |                 |                         |
| R <sup>2</sup>             | 0.9933                 |                           |                       |                 |                         |
| Explainable R <sup>2</sup> | 0.9999                 |                           |                       |                 |                         |

**Table S12.** Overview of CO<sub>2</sub> hydrogenation catalysts in the literature.

| Catalyst                                                | H <sub>2</sub> :CO <sub>2</sub><br>ratio | P<br>(MPa) | T<br>(K) | GHSV<br>(L/g <sub>cat</sub> ·h) | X <sub>CO2</sub><br>(%) | S <sub>CH3OH</sub><br>(%) | S <sub>CO</sub><br>(%) | S <sub>HC</sub><br>(%) <sup>f</sup> | STY <sub>CH3OH</sub><br>(mmol/g <sub>cat</sub> ·h) <sup>g</sup> | Ref. |
|---------------------------------------------------------|------------------------------------------|------------|----------|---------------------------------|-------------------------|---------------------------|------------------------|-------------------------------------|-----------------------------------------------------------------|------|
| In <sub>2</sub> O <sub>3</sub>                          | 3:1                                      | 4.0        | 543      | 15                              | 1.1                     | 54.9                      | -                      | -                                   | 0.78                                                            | 1    |
| In <sub>2</sub> O <sub>3</sub>                          | 3:1                                      | 4.0        | 603      | 15                              | 7.1                     | 39.7                      | -                      | -                                   | 3.69                                                            | 1    |
| Cu/ZrO <sub>2</sub>                                     | 3:1                                      | 0.1        | 493      | 75                              | 0.53                    | 19.8                      | 80.2                   | -                                   | 0.70                                                            | 2    |
| Cu/TiO <sub>2</sub>                                     | 3:1                                      | 0.1        | 493      | 5.6                             | 0.54                    | 13.8                      | 83.6                   | -                                   | 0.03                                                            | 2    |
| Cu/ZnO/ZrO <sub>2</sub>                                 | 3:1                                      | 1.0        | 473      | 8.8                             | 3.2                     | 64.7                      | -                      | -                                   | 2.43                                                            | 3    |
| Cu/CeO <sub>2</sub>                                     | 3:1                                      | 3.0        | 483      | 3.0                             | 2.4                     | 77.9                      | -                      | -                                   | 0.50                                                            | 4    |
| CuPd/CeO <sub>2</sub>                                   | 3:1                                      | 3.0        | 483      | 3.0                             | 4.3                     | 52.4                      | -                      | -                                   | 0.61                                                            | 4    |
| Cu/ZnO/Al <sub>2</sub> O <sub>3</sub>                   | 3:1                                      | 3.0        | 503      | 2.4                             | 18.7                    | 43.0                      | -                      | -                                   | 2.15                                                            | 5    |
| Cu/ZnO/ZrO <sub>2</sub>                                 | 3:1                                      | 3.0        | 503      | 2.4                             | 19.3                    | 48.6                      | -                      | -                                   | 2.51                                                            | 5    |
| Cu/ZnO/ZrO <sub>2</sub> /Al <sub>2</sub> O <sub>3</sub> | 3:1                                      | 3.0        | 503      | 2.4                             | 23.2                    | 60.3                      | -                      | -                                   | 3.75                                                            | 5    |
| Cu/MgO/Al <sub>2</sub> O <sub>3</sub>                   | 3:1                                      | 2.0        | 523      | 2.0                             | ~3                      | ~17                       | -                      | -                                   | 0.80                                                            | 6    |
| Cu/CeO <sub>2</sub> -CM <sup>a</sup>                    | 3:1                                      | 3.0        | 523      | 30                              | 1.0                     | 53                        | -                      | -                                   | 1.40                                                            | 7    |
| Cu/CeO <sub>2</sub> -cube                               | 3:1                                      | 3.0        | 523      | 30                              | 0.9                     | 25                        | -                      | -                                   | 0.60                                                            | 7    |
| Cu/CeO <sub>2</sub> -sphere                             | 3:1                                      | 3.0        | 523      | 30                              | 1.5                     | 52                        | -                      | -                                   | 2.00                                                            | 7    |
| Cu/CeO <sub>2</sub> -rod                                | 3:1                                      | 3.0        | 523      | 30                              | 1.2                     | 43                        | -                      | -                                   | 1.40                                                            | 7    |
| Cu/CeO <sub>2</sub> -FSP <sup>b</sup>                   | 3:1                                      | 3.0        | 523      | 30                              | 1.4                     | 48                        | -                      | -                                   | 1.90                                                            | 7    |

|                                      |     |     |     |     |      |      |      |     |      |           |
|--------------------------------------|-----|-----|-----|-----|------|------|------|-----|------|-----------|
| Cu/CeO <sub>2</sub> -CP <sup>c</sup> | 3:1 | 3.0 | 523 | 30  | 1.3  | 49   | -    | -   | 1.70 | 7         |
| Cu/CeO <sub>2</sub> -DP <sup>d</sup> | 3:1 | 3.0 | 523 | 30  | 1.6  | 50   | -    | -   | 2.10 | 7         |
| Cu-SiO <sub>2</sub>                  | 3:1 | 3.0 | 523 | 60  | 1.1  | 16   | -    | -   | 1.10 | 7         |
| CuCe                                 | 3:1 | 3.0 | 523 | 8.0 | 9.4  | 35.4 | 64.2 | 0.4 | 2.74 | This work |
| Cu/CeIn5                             | 3:1 | 3.0 | 548 | 8.0 | 9.7  | 46.4 | 52.8 | 0.8 | 3.70 | This work |
| CuCeIn10                             | 3:1 | 3.0 | 548 | 8.0 | 10.0 | 54.6 | 44.1 | 1.3 | 4.47 | This work |
| CuCeIn5 <sup>e</sup>                 | 3:1 | 3.0 | 456 | 12  | 0.7  | 99.3 | 0.0  | 0.7 | 0.85 | This work |

a. commercial ceria powder (<25 nm, Sigma-Aldrich).

b. prepared by a flame spray pyrolysis method.

c. prepared by a coprecipitation method.

d. prepared by deposition-precipitation on the commercial ceria powder (<25 nm, Sigma-Aldrich).

e. under the best conditions to promote CH<sub>3</sub>OH selectivity determined through chemometric analysis.

f. selectivity to hydrocarbons.

g. methanol space-time yield.



## Supplementary Figures

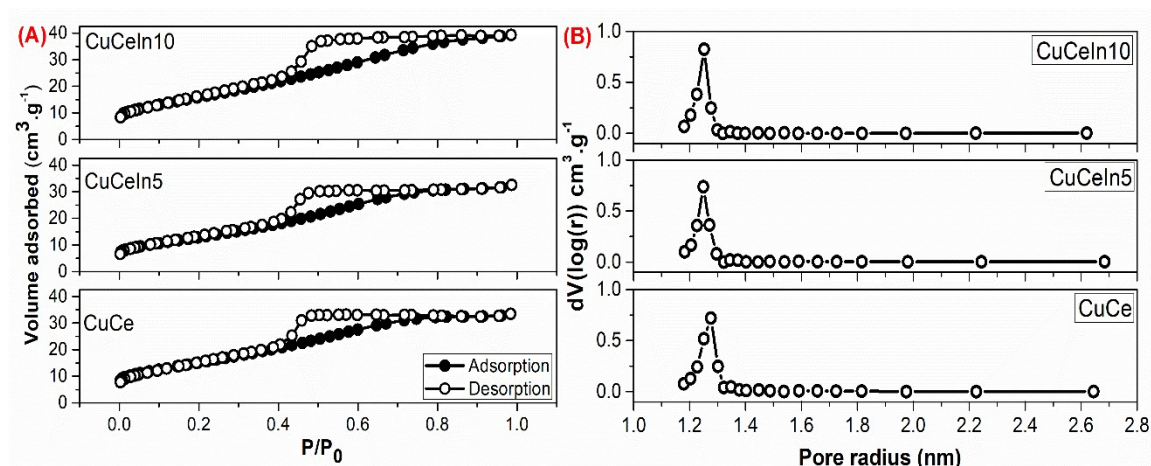

**Figure S1.** (A) N<sub>2</sub> adsorption/desorption isotherms and (B) pore size distribution for CuCe, CuCeIn5, and CuCeIn10 materials. All materials presented a type IV isotherm with hysteresis loop due to capillary condensation typical of mesoporous materials and similar pore size distribution.

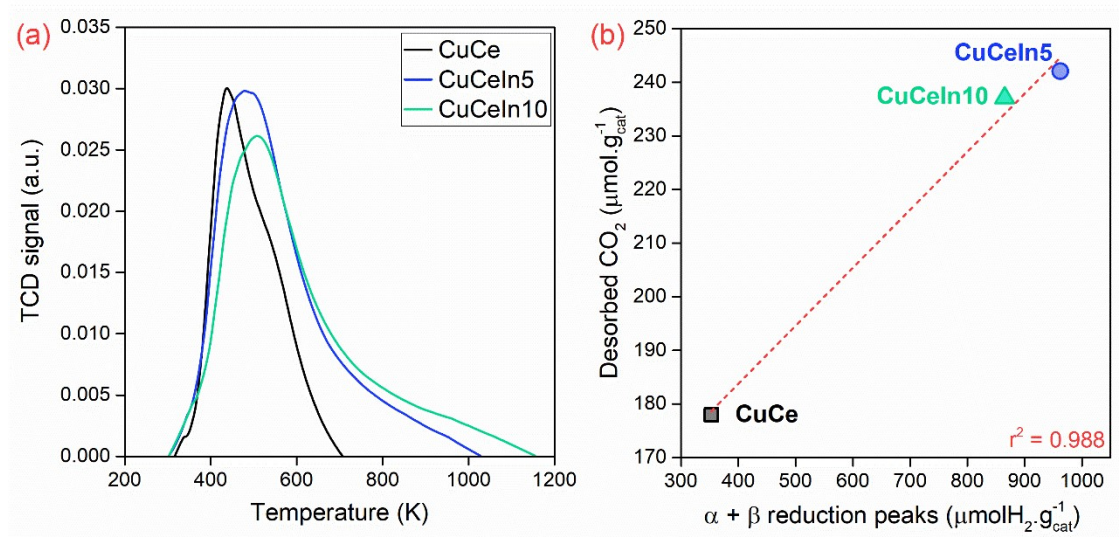

**Figure S2.** (a) CO<sub>2</sub> temperature-programmed desorption profiles for CuCe, CuCeIn5, and CuCeIn10 catalysts. (b) Correlation between α + β reduction peaks in H<sub>2</sub>-TPR and the amount of CO<sub>2</sub> desorb during CO<sub>2</sub>-TPD.

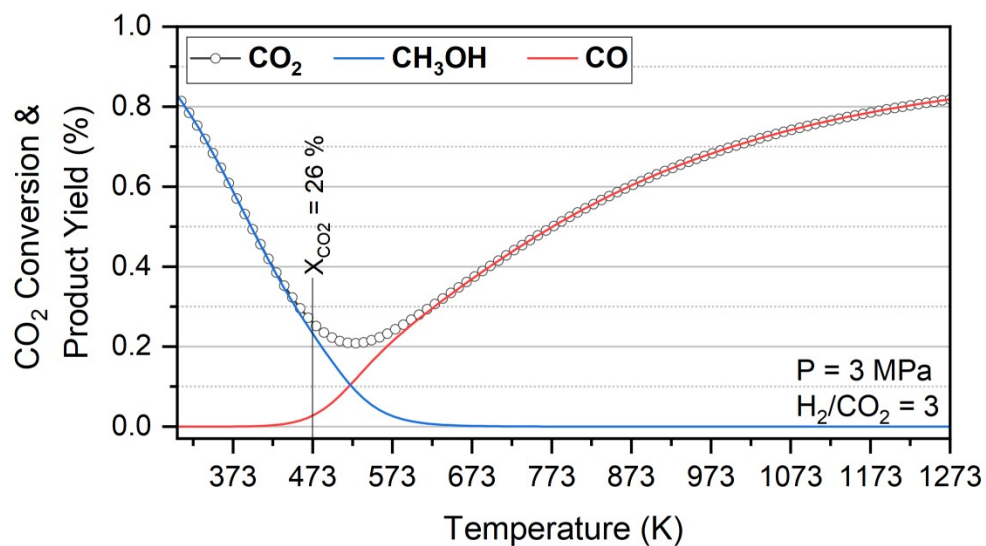

**Figure S3.** Thermodynamic equilibrium data. CO<sub>2</sub> conversion and yields for CH<sub>3</sub>OH and CO during hydrogenation at 3.0 MPa with a CO<sub>2</sub>:H<sub>2</sub> = 1:3 at the initial state.

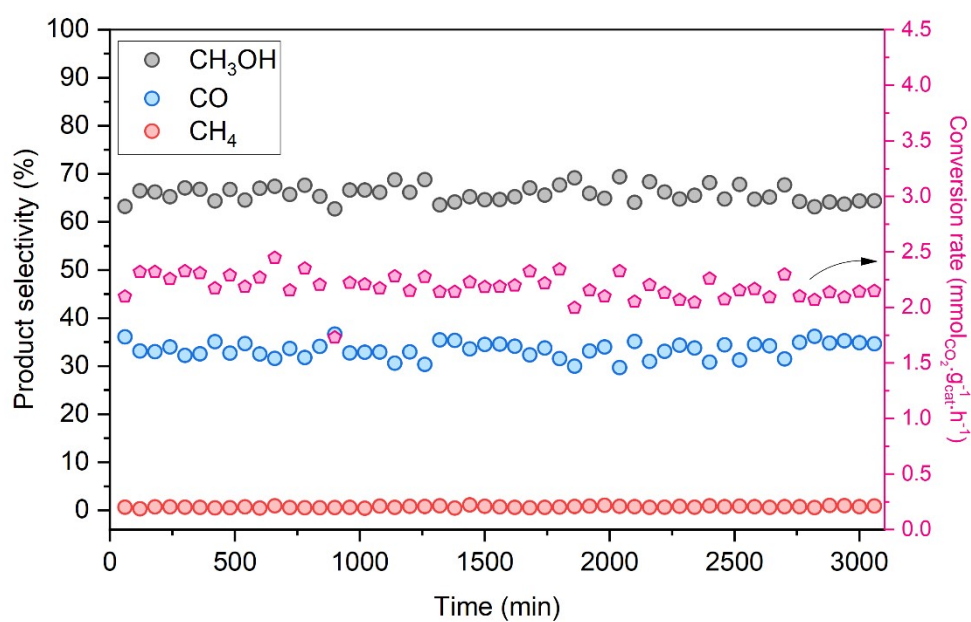

**Figure S4.** Stability test during CO<sub>2</sub> hydrogenation over CuCeIn<sub>5</sub>. Reaction conditions: 498 K, 3.0 MPa, 8 L.g<sup>-1</sup>.h<sup>-1</sup>, CO:H<sub>2</sub> = 1:3.

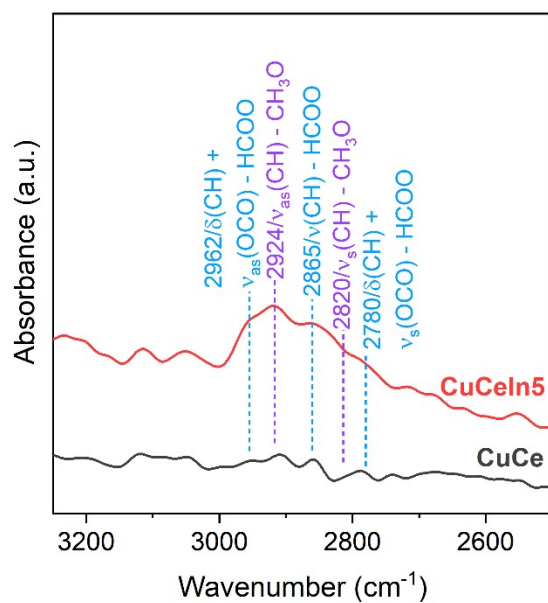

**Figure S5.** *In situ* DRIFTS analysis of CuCe and CuCeIn5 catalysts after CO<sub>2</sub> flow for 30 min followed by H<sub>2</sub> flow for additional 30 min at 473 K.

## References

- 1 K. Sun, Z. Fan, J. Ye, J. Yan, Q. Ge, Y. Li, W. He, W. Yang and C. J. Liu, *J. CO<sub>2</sub> Util.*, 2015, **12**, 1–6.
- 2 S. Kattel, B. Yan, Y. Yang, J. G. Chen and P. Liu, *J. Am. Chem. Soc.*, 2016, **138**, 12440–12450.
- 3 F. Arena, G. Italiano, K. Barbera, S. Bordiga, G. Bonura, L. Spadaro and F. Frusteri, *Appl. Catal. A Gen.*, 2008, **350**, 16–23.
- 4 E. J. Choi, Y. H. Lee, D. W. Lee, D. J. Moon and K. Y. Lee, *Mol. Catal.*, 2017, **434**, 146–153.
- 5 C. Li, X. Yuan and K. Fujimoto, *Appl. Catal. A Gen.*, 2014, **469**, 306–311.
- 6 V. D. B. C. Dasireddy, N. S. Štefančič, M. Huš and B. Likozar, *Fuel*, 2018, **233**, 103–112.
- 7 J. Zhu, Y. Su, J. Chai, V. Muravev, N. Kosinov and E. J. M. Hensen, *ACS Catal.*, 2020, **10**, 11532–11544.
